# Supplementary material for: Machine learning and dengue forecasting: Comparing random forests and artificial neural networks for predicting dengue burden at national and sub-national scales in Colombia
Source: PubMed Central journal article supplement (PMC7537891; doi:10.1371/journal.pntd.0008056), 2020-09-24

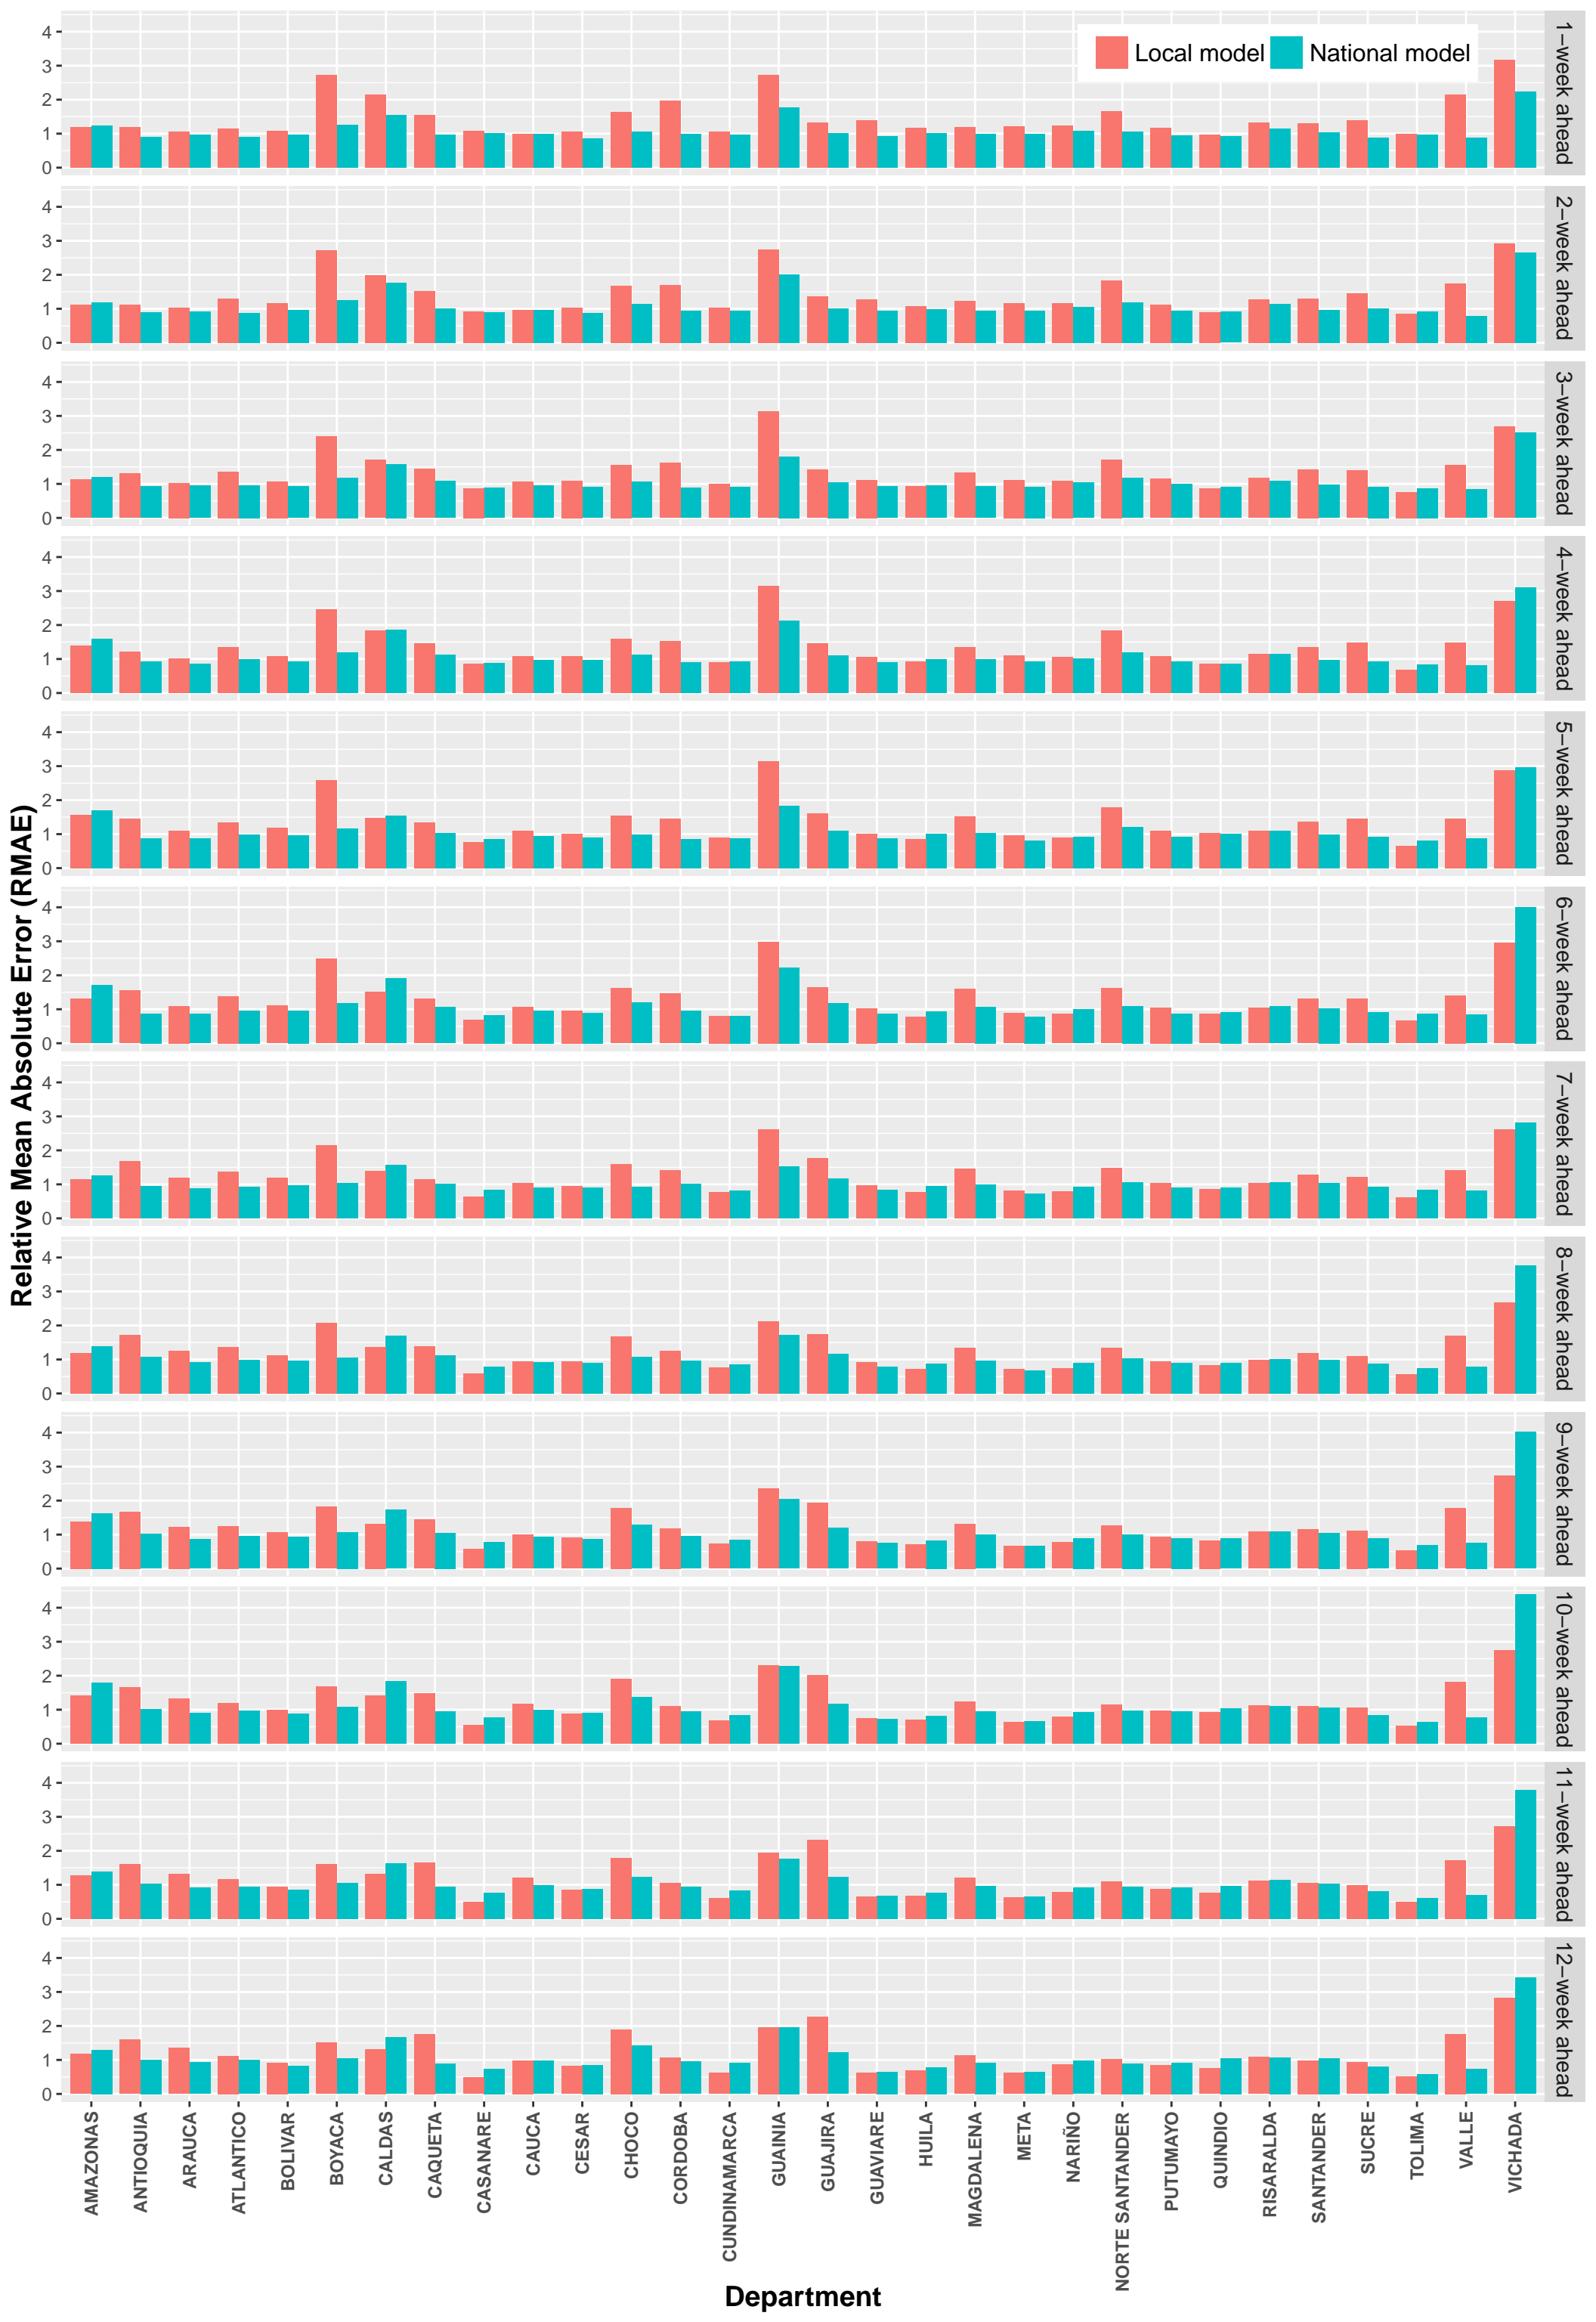

Supplement: pntd.0008056.s002.pdf [file pntd.0008056.s002.pdf]
